# Supplementary material for: Controllable synthesis of Cu2O hierarchical nanoclusters with high photocatalytic activity
Source: Royal Society of Chemistry journal article supplement (doi:10.1039/c4ra06119e), 2014-01-01
Supplement: c4ra06119e1.pdf [file c4ra06119e1.pdf]

## **Electronic Supplementary Information**

### **Controllable synthesis of Cu<sub>2</sub>O Hierarchical Nanoclusters with High Photocatalytic Activity**

*Lun Zhang<sup>1,2</sup>, Pengzhan Ying<sup>3\*</sup>, BingYu<sup>4</sup>, Ling Wu<sup>1</sup>, Jieru Wang<sup>5</sup>, Xiuquan Gu<sup>3</sup>,  
Shanliang Chen<sup>2</sup>, Rui Zhou<sup>4</sup>, Zhonghai Ni<sup>2\*</sup>*

<sup>1</sup> College of Sciences, China University of Mining and Technology, Xuzhou City, 221116, P.R. China.

<sup>2</sup> School of Chemical Engineering and Technology, China University of Mining and Technology, Xuzhou City, 221116, P.R. China.

<sup>3</sup> School of Material Science and Engineering, China University of Mining and Technology, Xuzhou City, 221116, P.R. China.

<sup>4</sup> Advanced Analysis & Computation Center, China University of Mining and Technology, Xuzhou City, 221116, P.R. China.

<sup>5</sup> Department of Materials science and Engineering, Zhejiang University, Hangzhou City, 310009, PR China.

#### ***Corresponding Author:***

***E-mail:*** [nizhonghaicumt@gmail.com](mailto:nizhonghaicumt@gmail.com) (Z. Ni)

***Tel:*** +86-0516-83883927, ***Fax:*** +86-0516-83883927

***E-mail:*** [ypz3889@sina.com](mailto:ypz3889@sina.com) (P. Ying)

***Tel:*** +86-0516-83995653, ***Fax:*** +86-0516-83995653

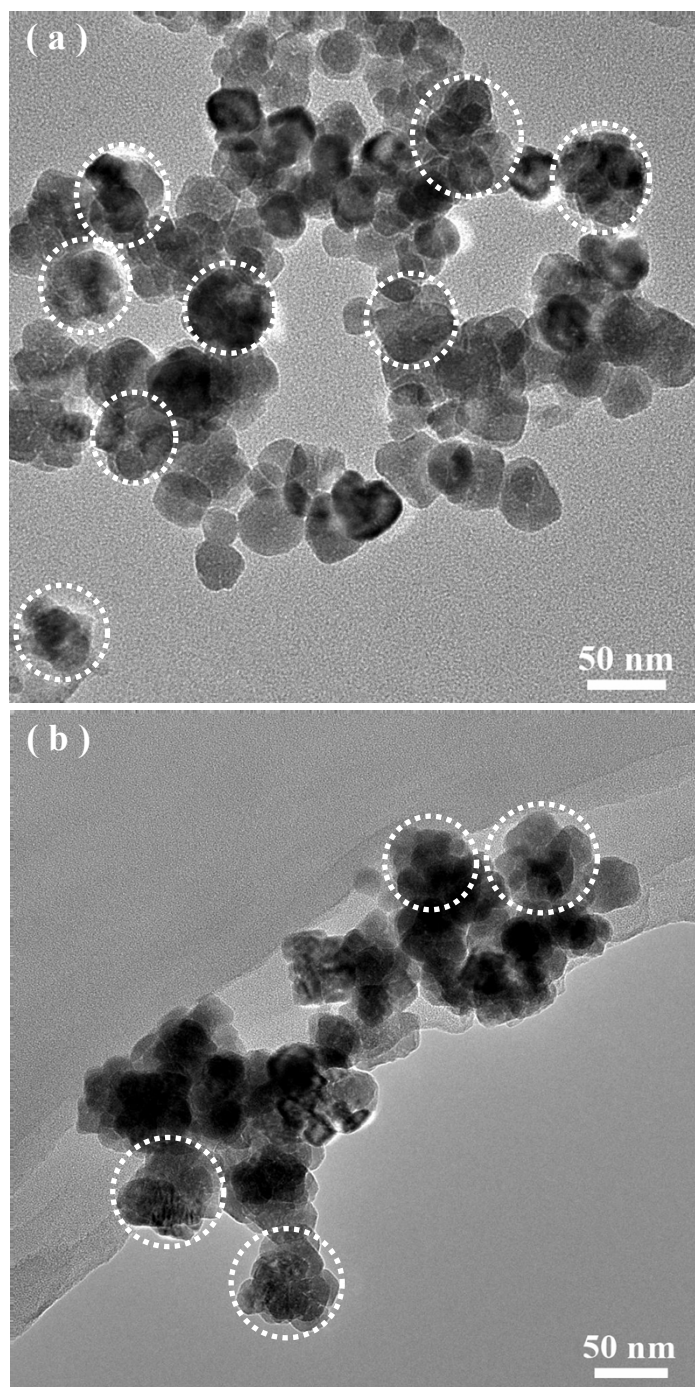

**Fig. S1** (a and b) Typical TEM images of Cu<sub>2</sub>O nanocrystals (S1) under high magnification

Note: It can be seen clearly that there are many “aggregation units” marked with white circles shown in Fig.S1. And sizes of the “units” are different ranging from 40 to 65 nm.

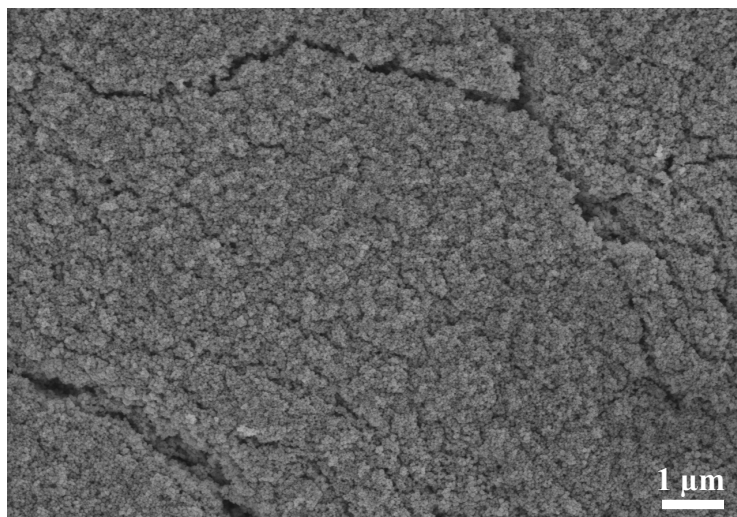

**Fig. S2** Typical SEM images of the Cu<sub>2</sub>O NCs (S2) under low magnification

Note: It can be seen obviously that S2 has uniform size distribution even under the large scanning scale.

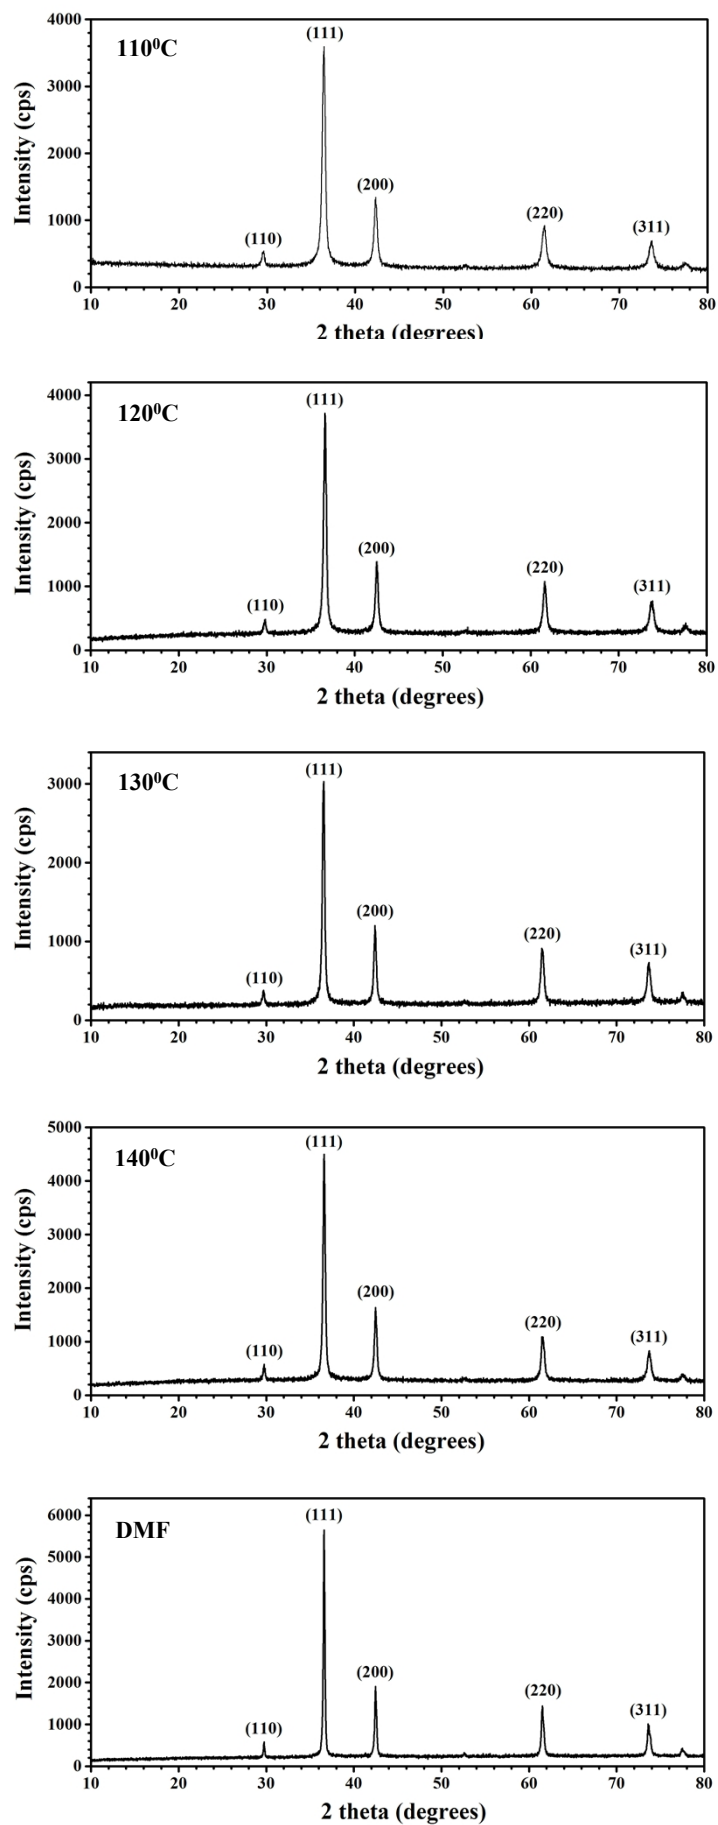

**Fig. S3** XRD patterns of different shaped  $\text{Cu}_2\text{O}$  nanocrystals.

“cps” is the abbreviation of the phrase of “counts per second”.

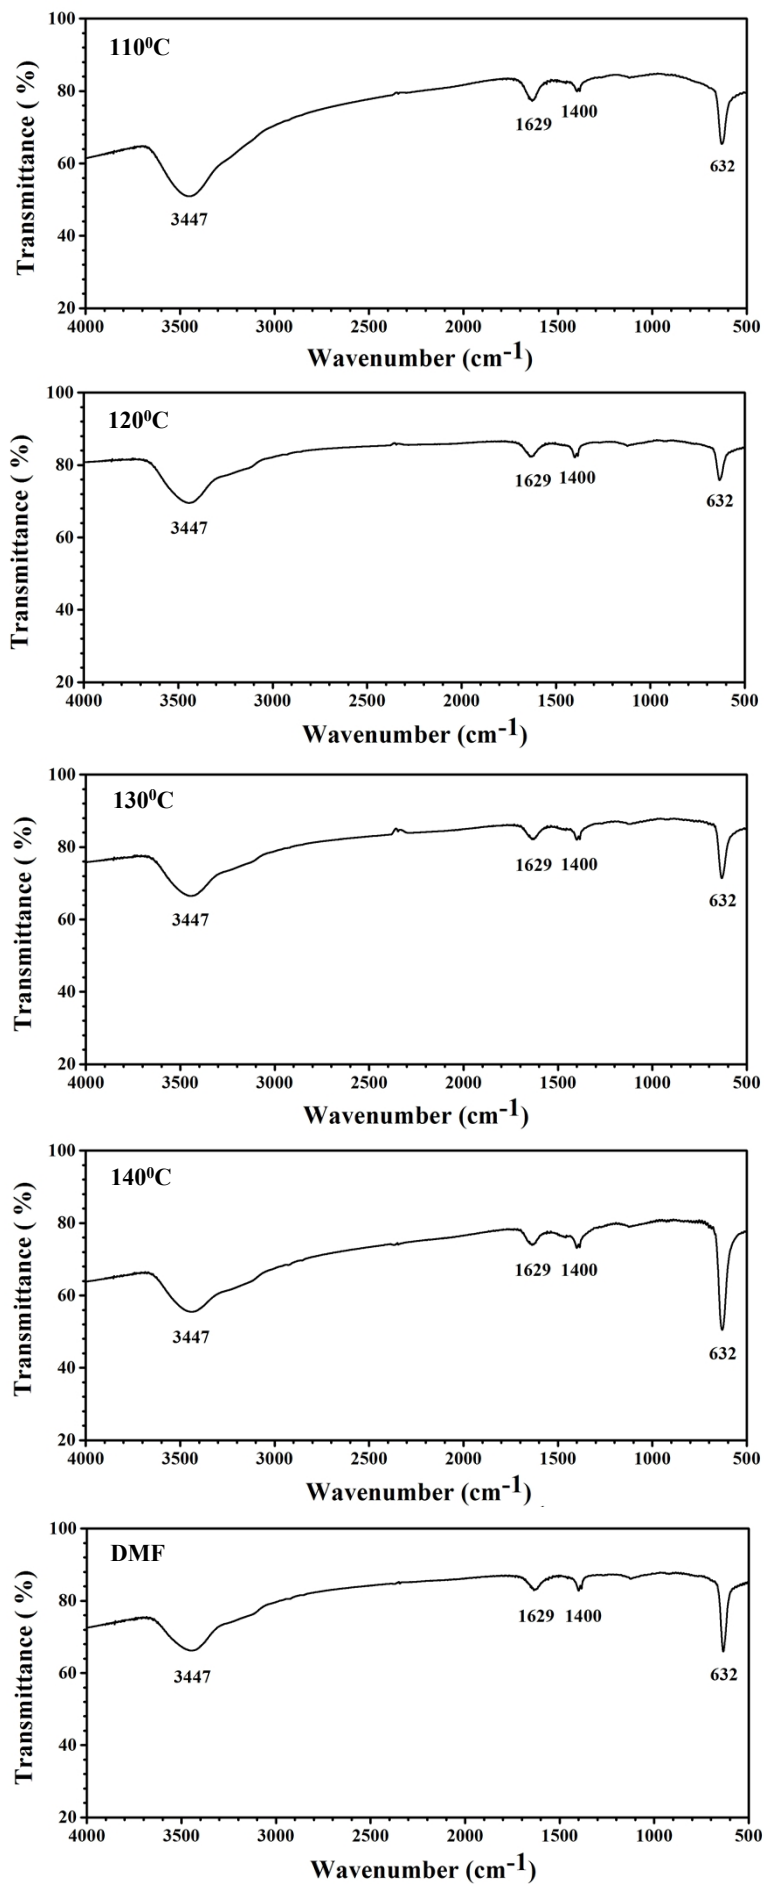

**Fig. S4** FT-IR spectra of various shaped Cu<sub>2</sub>O nanocrystals

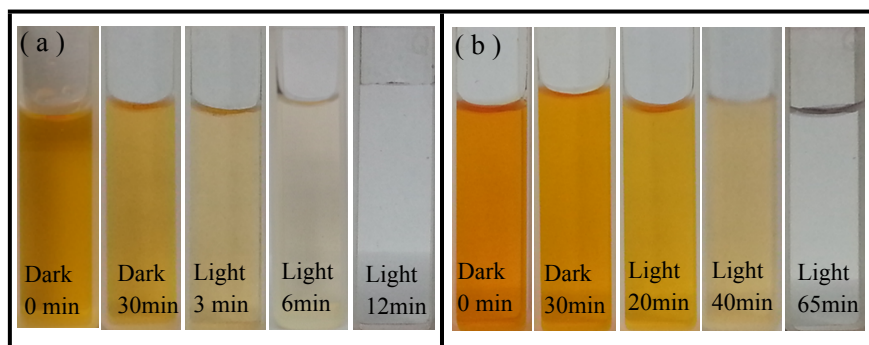

**Fig. S5** Digital pictures of the color changes with the irradiation time of  $\text{Cu}_2\text{O}$  NCs (S2) by using different initial concentrations of MO solution: (a) 10 mg/L (b) 40 mg/L

Further work has been done to prove that the effect observed is indeed photocatalysis, and not just continued adsorption. The experimental results are listed in Tab. S1 as following. For convenient discussion, the decoloration rate of MO is determined by the formula  $\eta \% = (C_0 - C_t)/C_0 \times 100 \%$ . Where,  $C_0$  and  $C_t$  represent the initial absorbance and the real time absorbance of MO solution in dark or under irradiation, respectively.

**Tab. S1** Adsorption property and photocatalytic activity of S2

| Initial concentration of MO aqueous solution | Experimental procedure                    | Decoloration rate of MO |
|----------------------------------------------|-------------------------------------------|-------------------------|
| 40 mg/L                                      | 30 mins (dark) plus 65 mins (dark)        | 51 %                    |
|                                              | 30 mins (dark) plus 65 mins (irradiation) | 100 %                   |
| 10 mg/L                                      | 30 mins (dark) plus 12 mins (dark)        | 55 %                    |
|                                              | 30 mins (dark) plus 12 mins (irradiation) | 100 %                   |
| 40 mg/L                                      | <b>16 hours in the dark</b>               | 100 %                   |
| 10 mg/L                                      | <b>15 hours in the dark</b>               | 100 %                   |

Note: The amount of S2 keeps the same (0.01g) in all the experiments with MO aqueous solution of 100 ml.

According to Tab.S1, it is obviously that photocatalysis really exists by using the most active  $\text{Cu}_2\text{O}$  sample (S2). Moreover, the adsorption rate of S2 becomes very very slow after 30 mins in the dark. Further experimental results indicate that MO can be completely adsorbed after 16 hours (40 mg/L) and 15 hours (10 mg/L) in the dark, respectively. Therefore, the effect observed is indeed photocatalysis.

**Tab. S2** Constants ( $k$ ) of each sample under different conditions

| Initial concentration of MO aqueous solution | S1     | S2     | S3     | S4     | S5     |
|----------------------------------------------|--------|--------|--------|--------|--------|
| 40 mg/L                                      | 0.0404 | 0.0533 | 0.0362 | 0.0293 | 0.0017 |
| 10 mg/L                                      | 0.0859 | 0.2033 | 0.0829 | 0.0818 | 0.0053 |



**Tab. S3** Photocatalytic activities of Cu<sub>2</sub>O with different morphologies and composites

| Morphologies of Cu <sub>2</sub> O | Average particle size of Cu <sub>2</sub> O | Composites                                        | The quality ratio between Cu <sub>2</sub> O and MO | Irradiation time | Degradation ratio of MO | Ref.      |
|-----------------------------------|--------------------------------------------|---------------------------------------------------|----------------------------------------------------|------------------|-------------------------|-----------|
| Porous sphere                     | ~300 nm                                    | Pure Cu <sub>2</sub> O                            | 10 mg:1.5 mg=20:3                                  | 3 h              | ~3%                     | 1         |
| 26(18)-facet Polyhedral           | 2 μm                                       | Pure Cu <sub>2</sub> O                            | 50 mg:1.5 mg=100:3                                 | 3 h              | 73%                     | 2         |
| Sphere                            | 200 nm                                     | rGO-Cu <sub>2</sub> O                             | 20 mg:1 mg=20:1                                    | 60 mins          | 96.6%                   | 3         |
| Sphere                            | 1-2 μm                                     | Cu-Cu <sub>2</sub> O                              | 50 mg:2.5 mg=20:1                                  | 20 mins          | 99.77%                  | 4         |
| Hollow sphere                     | 200 nm                                     | Au-Cu <sub>2</sub> O                              | 20 mg:16 mg=5:4                                    | 4 h              | ~70%                    | 5         |
| Irregular sphere                  | 20-40 nm                                   | TiO <sub>2</sub> -Cu <sub>2</sub> O               | 25 mg:1.5 mg=50:3                                  | 60 mins          | 90%                     | 6         |
| Quasi- sphere                     | 100-300 nm                                 | Fe <sub>3</sub> O <sub>4</sub> -Cu <sub>2</sub> O | 100 mg:3 mg=100:3                                  | 60 mins          | 90%                     | 7         |
| Octahedral                        | 60 nm                                      | Ag-Cu <sub>2</sub> O                              | 25 mg:2.5 mg=10:1                                  | 60 mins          | ~98%                    | 8         |
| NCs                               | 25nm                                       | Pure Cu <sub>2</sub> O                            | 10 mg:1 mg=10:1                                    | 12 mins          | 100%                    | This work |
| NCs                               | 25 nm                                      | Pure Cu <sub>2</sub> O                            | 10 mg:4 mg=5:2                                     | 65 mins          | 100%                    | This work |

Notes: (1) The definition of the degradation ratio is the same with the decoloration rate discussed before. (2) Porous sphere Cu<sub>2</sub>O. The degradation ratio of MO was not provided with accurate value but with curve at different time.<sup>1</sup> (3) rGO-Cu<sub>2</sub>O composites with weight ratio 2:5.<sup>3</sup> (4) Cu-Cu<sub>2</sub>O composites with weight ratio 6:125.<sup>4</sup> (5) Au-Cu<sub>2</sub>O composites with molar ratio 1:20. The degradation ratio of MO was not provided with accurate value but with curve at different time.<sup>5</sup> (6) TiO<sub>2</sub>-Cu<sub>2</sub>O composites with molar ratio 1:9.<sup>6</sup> (7) Fe<sub>3</sub>O<sub>4</sub>-Cu<sub>2</sub>O composites with weight ratio 4:6.<sup>7</sup> The degradation ratio of MO was not provided with accurate value but with curve at different time. (8) Ag-Cu<sub>2</sub>O composites with molar ratio 3:10.<sup>8</sup>

## References

- 1 L. Feng, C. Zhang, G. Gao and D. Cui, *Nanoscale Res. Lett.*, 2012, **7**, 1.
- 2 Y. Zhang, B. Deng, T. Zhang, D. Gao and A. W. Xu, *J. Phys. Chem. C*, 2010, **114**, 5073.
- 3 A. Abulizi, G. H. Yang and J. J. Zhu, *Ultrason. Sonochem*, 2014, **21**, 129.
- 4 J. Dai, X. Fan, H. Liu, J. Wang, H. Liu and F. Zhang, *J. Nanosc. Nanotech.*, 2012, **12**, 6412.
- 5 Q. Hua, F. Shi, K. Chen, S. Chang, Y. Ma, Z. Jiang, G. Pan and W. Huang, *Nano Res.*, 2011, **4**, 948.
- 6 L. Huang, S. Zhang, F. Peng, H. Wang, H. Yu, J. Yang, S. Zhang and H. Zhao, *Scripta Mater.*, 2010, **63**, 159.
- 7 Z. P. Li, Y. Q. Wen, J. P. Shang, M. X. Wu, L. F. Wang and Y. Guo, *Chinese Chem. Lett.*, 2013.
- 8 X. Lin, R. Zhou, J. Zhang and S. Fei, *Appl. Surf. Sci.*, 2009, **256**, 889.
